# Supplementary material for: Tough, Stretchable, and Thermoresponsive Smart Hydrogels
Source: MDPI journal article supplement (doi:10.3390/gels9090695), 2023-08-28
Supplement: s1 [file s1]

Supplementary Materials

# Fabrication of Thermo-Responsive Controllable Shape-Changing Hydrogel

Yi Luo, Werner Pauer and Gerrit A. Luinstra\*

\* Correspondence: luinstra@chemie.uni-hamburg.de;

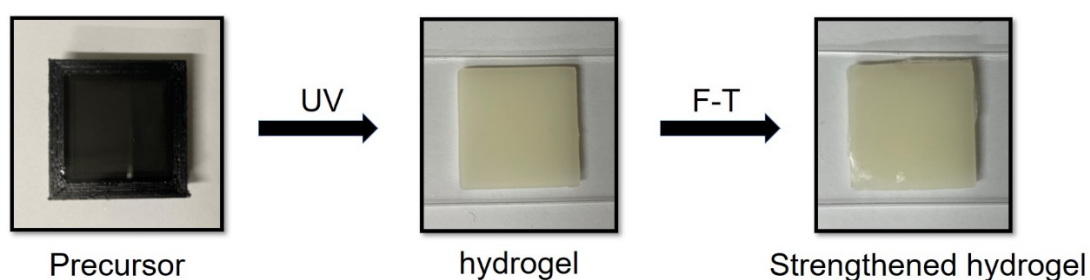

Figure S1. Photos of the hydrogel in each fabrication progress.

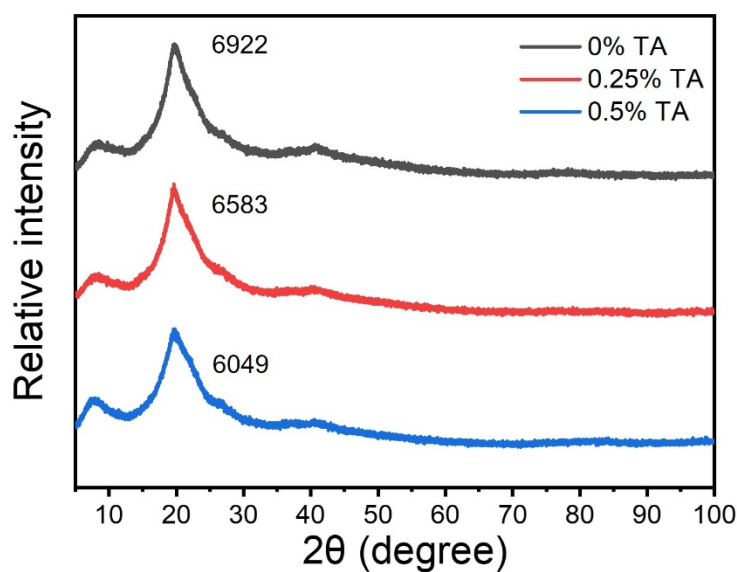

Figure S2. XRD spectra of the hydrogel without TA (black), with 0.25 wt.% TA (red) and 0.5 wt.% TA (blue).

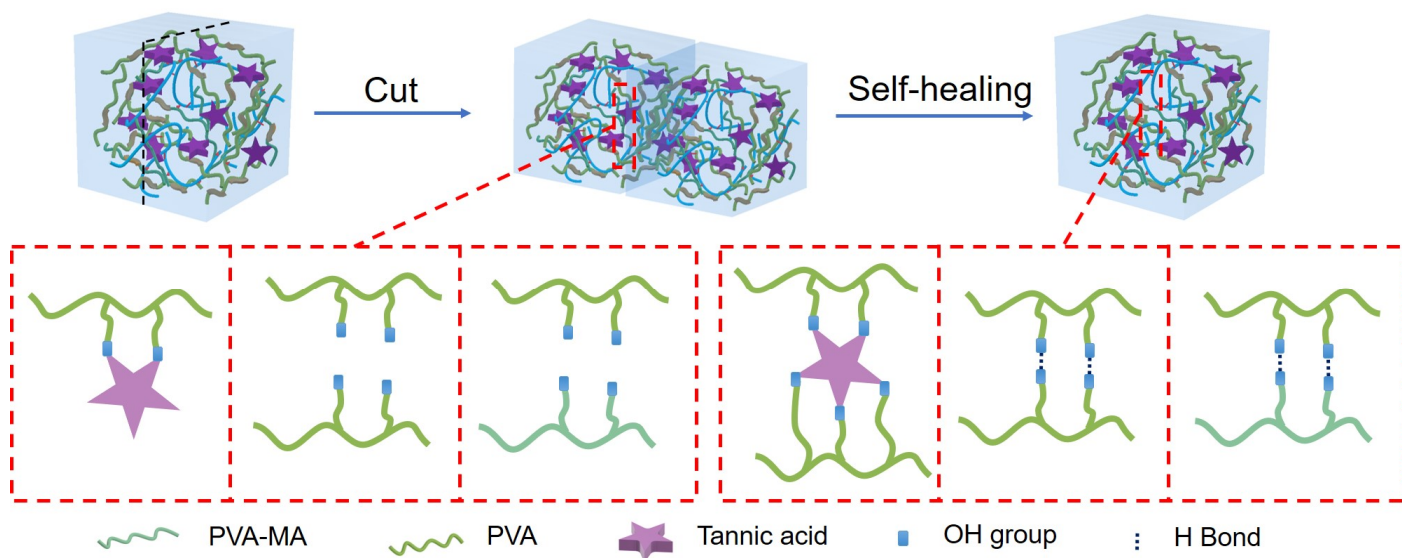

Figure S3. The mechanism of the self-healing.

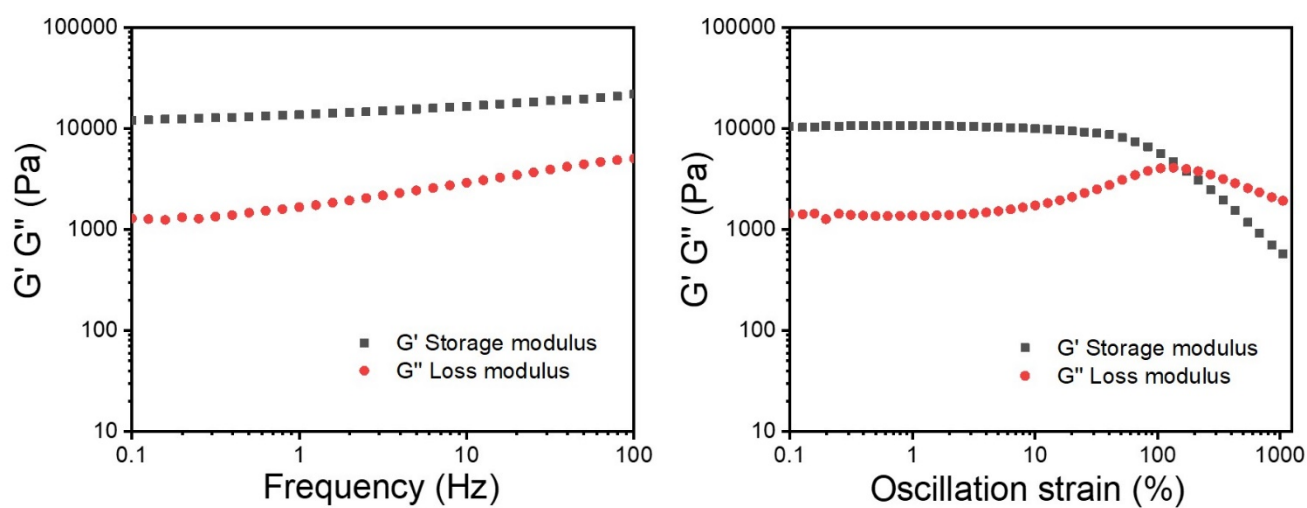

Figure S4. The rheological properties of hydrogels: the amplitude sweeps (a) and the frequency sweeps (b) of the hydrogels.

Table S1. Mechanical data of PVA/TA(0.5 wt.)/PVA-MA-g-PNIPAAm hydrogel at 25°C

| TA content (wt)             | 0%         |             | 0.25%       |             | 0.50%       |             |
|-----------------------------|------------|-------------|-------------|-------------|-------------|-------------|
|                             | original   | self-healed | original    | self-healed | original    | self-healed |
| Young's modulus (MPa)       | 0.12       | 0.108       | 0.058       | 0.044       | 0.085       | 0.082       |
| elongation at break (mm/mm) | 2.76       | 1.24        | 7.05        | 5.87        | 8.82        | 8           |
| stress at break (MPa)       | 0.4 (0.05) | 0.13 (0.08) | 0.69 (0.04) | 0.43 (0.03) | 1.39 (0.04) | 1.13 (0.02) |
| healing-efficiency HE (%)   | 33         |             | 62          |             | 81          |             |

Table S2. Rheological data of BIS-crosslinked PVA/TA (0.5 wt.)/PVA-MA-g-PNIPAAm and crosslinked PVA/TA(0.5 wt.)/PVA-MA-g-PNIPAAm.

| Time (s) | Oscillatory stress (Pa) |                        | G' (Pa)         |                        | G'' (Pa)        |                        |
|----------|-------------------------|------------------------|-----------------|------------------------|-----------------|------------------------|
|          | BIS-crosslinked         | Physically crosslinked | BIS-crosslinked | Physically crosslinked | BIS-crosslinked | Physically crosslinked |
| 6        | 89.36                   | 11.61                  | 24390           | 10510                  | 3191            | 1307                   |
| 13       | 241.1                   | 95.44                  | 23630           | 8930                   | 3058            | 1344                   |
| 19       | 237.2                   | 88.87                  | 23290           | 8862                   | 3002            | 1453                   |
| 26       | 235.3                   | 88.46                  | 23720           | 8812                   | 3099            | 1467                   |
| 39       | 237                     | 88.01                  | 23850           | 8771                   | 2927            | 1534                   |
| 45       | 238.3                   | 87.94                  | 23910           | 8755                   | 3047            | 1520                   |
| 58       | 236.3                   | 87.62                  | 23830           | 8703                   | 2861            | 1550                   |
| 70       | 235.4                   | 87.36                  | 23380           | 8714                   | 2847            | 1551                   |
| 77       | 236                     | 87.33                  | 23730           | 8660                   | 2770            | 1574                   |
| 90       | 237.2                   | 87.17                  | 23920           | 8684                   | 2705            | 1595                   |
| 106      | 9827                    | 1334                   | 1204            | 138.9                  | 6363            | 649.8                  |
| 113      | 11730                   | 1379                   | 1459            | 109.5                  | 5846            | 524.2                  |
| 119      | 12760                   | 1389                   | 1759            | 117.4                  | 6074            | 548.9                  |
| 126      | 13680                   | 1458                   | 1974            | 125.5                  | 6008            | 576.1                  |
| 139      | 14950                   | 1584                   | 2272            | 142.4                  | 5962            | 621.9                  |
| 145      | 15350                   | 1595                   | 2378            | 144.1                  | 5973            | 623.3                  |
| 158      | 15890                   | 1663                   | 2528            | 151                    | 5892            | 650.9                  |
| 170      | 16150                   | 1685                   | 2663            | 154.3                  | 5959            | 659.2                  |
| 177      | 16320                   | 1727                   | 2732            | 159                    | 5998            | 672.3                  |
| 190      | 16380                   | 1770                   | 2793            | 161.4                  | 5953            | 690.1                  |
| 206      | 87.08                   | 11.93                  | 22140           | 11800                  | 3278            | 2313                   |
| 213      | 221.6                   | 102.6                  | 21710           | 9081                   | 3142            | 1888                   |
| 219      | 219.9                   | 91.94                  | 22030           | 9174                   | 3203            | 1831                   |
| 226      | 222.1                   | 92.06                  | 22060           | 9127                   | 3048            | 1773                   |
| 239      | 223.5                   | 91.33                  | 22150           | 9054                   | 3008            | 1740                   |
| 245      | 223.4                   | 90.99                  | 22130           | 9033                   | 2914            | 1712                   |
| 258      | 223.9                   | 90.2                   | 22120           | 8937                   | 3064            | 1700                   |
| 270      | 224.7                   | 89.56                  | 22350           | 8884                   | 3091            | 1676                   |

|     |       |       |       |        |      |       |
|-----|-------|-------|-------|--------|------|-------|
| 277 | 224.9 | 89.1  | 22340 | 8825   | 3003 | 1659  |
| 290 | 225.7 | 88.59 | 22470 | 8800   | 3060 | 1663  |
| 306 | 12910 | 1517  | 3238  | 185.5  | 6048 | 781.5 |
| 313 | 16430 | 1557  | 2421  | 129.2  | 5601 | 583   |
| 319 | 15470 | 1630  | 2745  | 149.9  | 5803 | 649.8 |
| 326 | 15940 | 1636  | 2709  | 147.2  | 5757 | 636.9 |
| 339 | 15870 | 1715  | 2774  | 159.3  | 5738 | 674.1 |
| 345 | 15860 | 1782  | 2794  | 168.3  | 5723 | 699   |
| 358 | 15760 | 1814  | 2801  | 172.3  | 5658 | 706.5 |
| 370 | 15590 | 1834  | 2797  | 175.5  | 5587 | 715.6 |
| 377 | 15490 | 1844  | 2778  | 177.1  | 5531 | 718.9 |
| 390 | 15230 | 1915  | 2760  | 185.1  | 5455 | 745.9 |
| 406 | 83.46 | 11.73 | 19850 | 12150  | 3084 | 2567  |
| 413 | 198.1 | 106   | 19270 | 9308   | 2790 | 2182  |
| 419 | 195.7 | 95.37 | 19660 | 9489   | 3002 | 2183  |
| 426 | 198.1 | 95.73 | 19640 | 9439   | 2849 | 2106  |
| 439 | 199.7 | 94.88 | 19880 | 9366   | 2838 | 2056  |
| 445 | 199.8 | 94.31 | 19780 | 9308   | 2654 | 2005  |
| 458 | 199.9 | 93.51 | 19680 | 9248   | 2808 | 1987  |
| 470 | 200.2 | 92.66 | 19980 | 9177   | 2945 | 1945  |
| 477 | 201.4 | 92.44 | 19970 | 9121   | 2911 | 1945  |
| 490 | 203.1 | 91.49 | 20240 | 9054   | 2994 | 1908  |
| 506 | 12160 | 1613  | 3151  | 190.8  | 5537 | 757.2 |
| 513 | 15230 | 1697  | 2360  | 153.3  | 5142 | 601.6 |
| 519 | 14270 | 1708  | 2613  | 175.2  | 5269 | 657.6 |
| 526 | 14570 | 1795  | 2554  | 182.8  | 5213 | 677.4 |
| 539 | 14470 | 1811  | 2582  | 175.45 | 5189 | 694.1 |
| 545 | 14390 | 1860  | 2578  | 178.75 | 5156 | 689.9 |
| 558 | 14220 | 1868  | 2578  | 191.2  | 5085 | 698.6 |
| 570 | 14160 | 1874  | 2577  | 199.25 | 5054 | 744.9 |
| 577 | 14120 | 1916  | 2607  | 205.8  | 5038 | 748.2 |
| 590 | 14110 | 2070  | 2624  | 212.3  | 5016 | 764.4 |

Table S3. Length (L), final length change (LC), and its linear rate constant ( $R_{LC}$ ) of PVA/TA(0.5 wt%)/PVA-MA-g-PNIPAAm while cycling in 30 min intervals between 25 °C and 50 °C in deionized water.

| operation | L (%) | LC (%) | $R_{LC}$ (%/min) |
|-----------|-------|--------|------------------|
| heat 1    | 83.63 | 16.37  | 16.37            |
| cool 1    | 85.34 | 14.37  | 17.18            |
| heat 2    | 82.40 | 17.25  | 17.60            |
| cool 2    | 83.99 | 15.40  | 19.07            |
| heat 3    | 82.23 | 17.20  | 17.77            |
| cool 3    | 82.93 | 16.16  | 20.21            |
| heat 4    | 82.03 | 17.16  | 17.97            |
| cool 4    | 82.35 | 16.78  | 21.43            |
| heat 5    | 81.79 | 17.31  | 18.21            |
| cool 5    | 82.27 | 16.76  | 21.55            |
